# Supplementary material for: A web server for comparative analysis of single-cell RNA-seq data
Source: PubMed Central journal article supplement (PMC6233170; doi:10.1038/s41467-018-07165-2), 2018-11-13
Supplement: 41467_2018_7165_MOESM3_ESM.pdf [file 41467_2018_7165_MOESM3_ESM.pdf]

Source data for all applicable figures (Figure 3)
